# Supplementary material for: Phosphodiesterase 5 and Arginase Inhibitory Activities of the Extracts from Some Members of Nelumbonaceae and Nymphaeaceae Families
Source: MDPI journal article supplement (doi:10.3390/molecules28155821), 2023-08-02
Supplement: s1 [file s1]

Supplementary Files

# Phosphodiesterase 5 and Arginase Inhibitory Activities of the Extracts from Some Members of Nelumbonaceae and Nymphaeaceae Families

Teerapap Panklai <sup>1,2</sup>, Nungruthai Suphrom <sup>3</sup>, Prapapan Temkitthawon <sup>1</sup>, Perle Totoson <sup>2</sup>, Krongkarn Chootip <sup>4</sup>, Xiao-Liang Yang <sup>5</sup>, Hui-Ming Ge <sup>6</sup>, Zhu-Jun Yao <sup>5</sup>, Nattiya Chaichamnong <sup>7</sup>, Kornkanok Ingkaninan <sup>1,\*</sup> and Corine Girard <sup>2</sup>

<sup>1</sup> Center of Excellence in Cannabis Research, Faculty of Pharmaceutical Sciences and Center of Excellence for Innovation in Chemistry, Naresuan University, Phitsanulok 65000, Thailand; teerapapp62@nu.ac.th (T.P.); prapapantem@gmail.com (P.T.)

<sup>2</sup> Université de Franche-Comté, PEPITE, Besançon 25000, France; perle.totoson@univ-fcomte.fr (P.T.); corine.girard@univ-fcomte.fr (C.G.)

<sup>3</sup> Department of Chemistry, Faculty of Science and Center of Excellence for Innovation in Chemistry, Naresuan University, Phitsanulok 65000, Thailand; suphrom.n1@gmail.com

<sup>4</sup> Department of Physiology, Faculty of Medical Science and Center of Excellence for Innovation in Chemistry, Naresuan University, Phitsanulok 65000, Thailand; krongkarnc@nu.ac.th

<sup>5</sup> State Key Laboratory of Coordination Chemistry, Jiangsu Key Laboratory of Advance Organic Materials, School of Chemistry and Chemical Engineering, Nanjing University, Nanjing 210023, China; yxlnmr@nju.edu.cn (X.-L.Y.); yaoz@nju.edu.cn (Z.-J.Y.)

<sup>6</sup> State Key Laboratory of Pharmaceutical Biotechnology, Institute of Functional Biomolecules, School of Life Sciences, Nanjing University, Nanjing 210023, China; hmge@nju.edu.cn

<sup>7</sup> Division of Applied Thai Traditional Medicine, Faculty of Public Health, Naresuan University, Phitsanulok 65000, Thailand; orangejussamine@hotmail.com

\* Correspondence: k\_ingkaninan@yahoo.com; Tel.: +66-81-4817350

## Supplementary Materials

**Table S1:** Calibration data, LOD, and LOQ of the flavonoids **1-6** analyzed by HPLC.

**Table S2:** Intra- and Inter-day precision and accuracy of flavonoids **1-6** analyzed by HPLC.

**Table S1.** Calibration data, LOD, and LOQ of the flavonoids 1-6 analyzed by HPLC.

| Flavonoids | Linearity range (µg/ml) | Regression equation | Correlation coefficient (r <sup>2</sup> ) | LOD (µg/ml) | LOQ (µg/ml) |
|------------|-------------------------|---------------------|-------------------------------------------|-------------|-------------|
| 1          | 0.5 - 100               | y = 23100x - 4376.5 | 0.9999                                    | 0.09        | 0.5         |
| 2          | 5.0 - 400               | y = 20691x + 69562  | 0.9997                                    | 0.85        | 5.0         |
| 3          | 0.5 - 100               | y = 64186x - 48477  | 0.9997                                    | 0.15        | 0.5         |
| 4          | 0.5 - 100               | y = 27499x - 5199   | 0.9999                                    | 0.05        | 0.5         |
| 5          | 0.5 - 100               | y = 65813x - 10389  | 0.9999                                    | 0.09        | 0.5         |
| 6          | 0.5 - 100               | y = 44580x + 4643.1 | 0.9999                                    | 0.04        | 0.5         |

**Table S2.** Intra- and Inter-day precision and accuracy of flavonoids 1-6 analyzed by HPLC.

| Flavonoids | Concentration levels (µg/ml) | Intra-day (n=3)                     |                  | Inter-day (n=9)                     |                  | Accuracy (n=3)         |                  |
|------------|------------------------------|-------------------------------------|------------------|-------------------------------------|------------------|------------------------|------------------|
|            |                              | Measured concentration (µg/ml) ± SD | Precision (%RSD) | Measured concentration (µg/ml) ± SD | Precision (%RSD) | Recovery (%) Mean ± SD | Precision (%RSD) |
| 1          | 3                            | 2.71 ± 0.003                        | 0.13             | 2.74 ± 0.05                         | 1.83             | 90.04 ± 1.87           | 2.08             |
|            | 25                           | 23.63 ± 0.56                        | 2.37             | 25.04 ± 0.73                        | 3.00             | 86.69 ± 1.47           | 1.69             |
|            | 65                           | 62.94 ± 1.01                        | 1.60             | 64.09 ± 1.04                        | 1.63             | 90.05 ± 2.54           | 2.82             |
| 2          | 15                           | 13.08 ± 0.24                        | 1.86             | 13.01 ± 0.28                        | 2.12             | 85.13 ± 1.53           | 1.79             |
|            | 75                           | 75.90 ± 1.23                        | 1.62             | 77.15 ± 1.98                        | 2.57             | 94.82 ± 0.73           | 0.77             |
|            | 300                          | 309.05 ± 1.41                       | 0.46             | 311.04 ± 8.65                       | 2.78             | 100.97 ± 2.44          | 2.42             |
| 3          | 3                            | 2.94 ± 0.06                         | 2.06             | 2.98 ± 0.09                         | 2.85             | 106.17 ± 1.28          | 1.20             |
|            | 25                           | 27.01 ± 0.24                        | 0.89             | 27.09 ± 0.61                        | 2.25             | 98.46 ± 1.49           | 1.51             |
|            | 65                           | 66.27 ± 1.15                        | 1.74             | 66.45 ± 1.64                        | 2.47             | 109.92 ± 0.91          | 0.82             |
| 4          | 3                            | 2.83 ± 0.07                         | 2.61             | 2.87 ± 0.06                         | 2.17             | 86.21 ± 2.40           | 2.78             |
|            | 25                           | 23.96 ± 0.56                        | 2.33             | 24.48 ± 0.60                        | 2.43             | 86.14 ± 2.06           | 2.40             |
|            | 65                           | 63.38 ± 1.26                        | 1.99             | 64.74 ± 1.57                        | 2.42             | 90.23 ± 0.57           | 0.63             |
| 5          | 3                            | 2.58 ± 0.04                         | 1.63             | 2.65 ± 0.06                         | 2.18             | 103.43 ± 0.72          | 0.69             |
|            | 25                           | 25.47 ± 0.41                        | 1.62             | 25.50 ± 0.63                        | 2.46             | 100.67 ± 0.65          | 0.64             |
|            | 65                           | 64.63 ± 1.90                        | 2.94             | 63.16 ± 1.64                        | 2.49             | 105.74 ± 1.13          | 1.07             |
| 6          | 3                            | 2.69 ± 0.02                         | 0.90             | 2.70 ± 0.03                         | 1.28             | 89.43 ± 1.27           | 1.42             |
|            | 25                           | 23.76 ± 0.49                        | 2.06             | 24.26 ± 0.55                        | 2.26             | 96.79 ± 2.19           | 2.27             |
|            | 65                           | 63.06 ± 1.12                        | 1.77             | 64.24 ± 1.56                        | 2.43             | 92.69 ± 0.83           | 0.89             |
